# Supplementary material
Source: Springer Nature journal article supplement (https://www.springermedizin.de/resource/supplementary/12937_2010_304_MOESM2_ESM.pdf/25654826)

OR

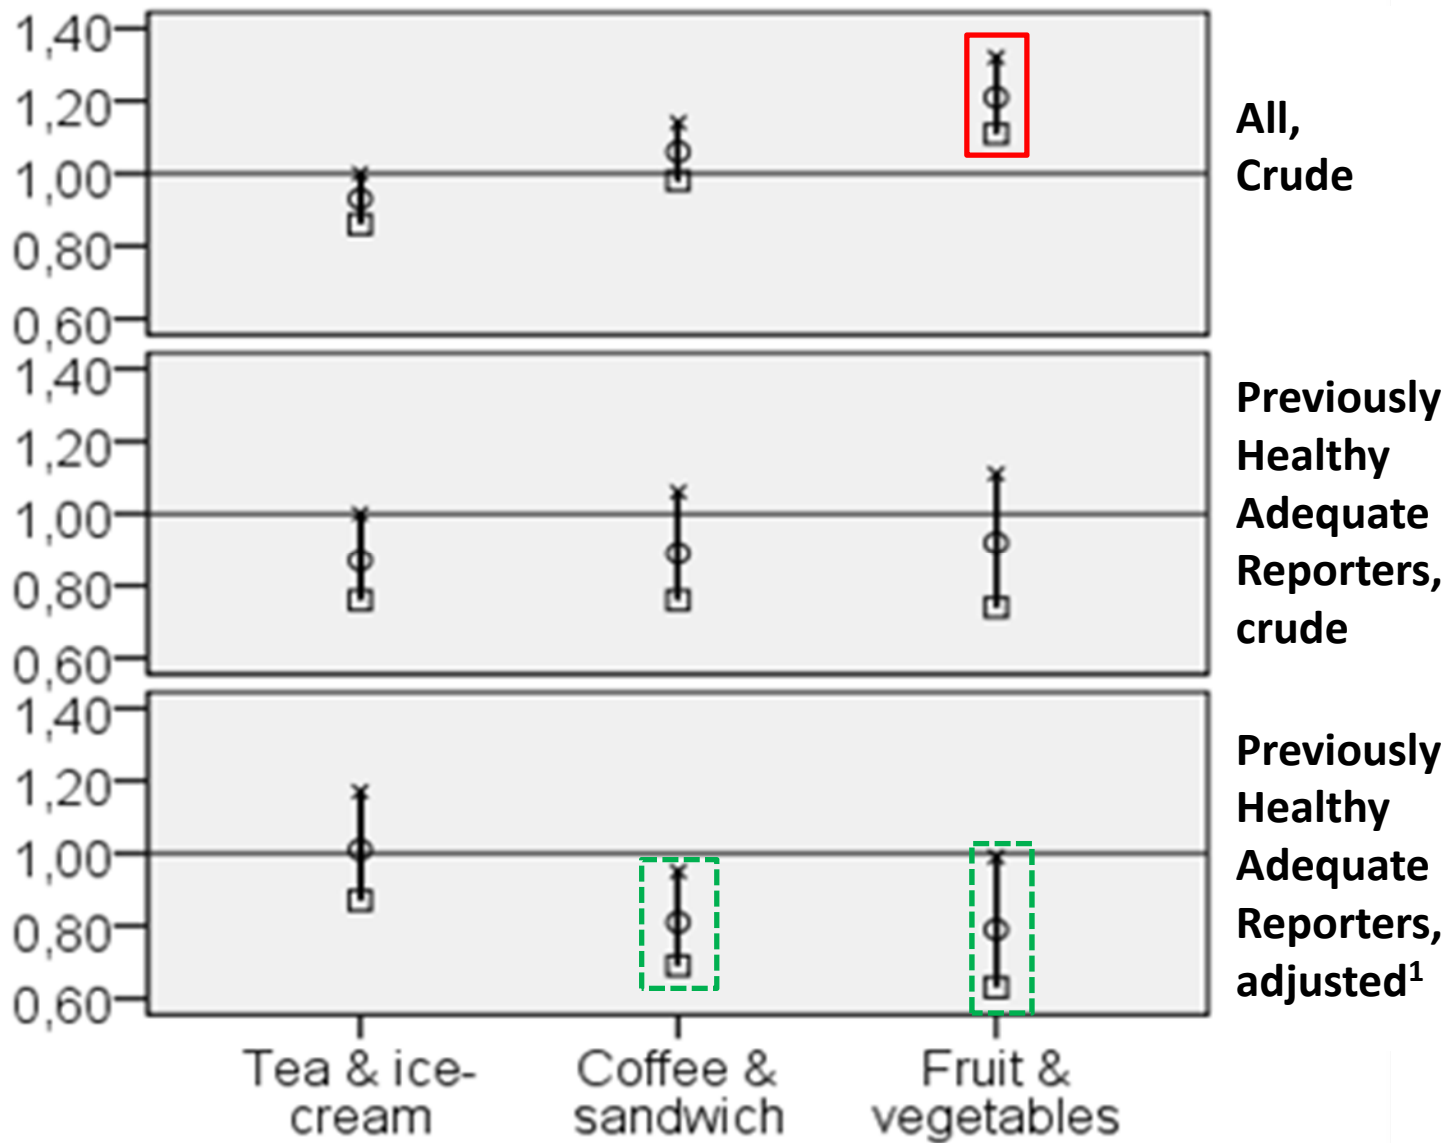

Supplement: MOESM2 [file 25654826]
